# Supplementary material for: Evaluation of the NLRP3 Inflammasome Activating Effects of a Large Panel of TiO2 Nanomaterials in Macrophages
Source: MDPI journal article supplement (doi:10.3390/nano10091876), 2020-09-19
Supplement: s1 [file s1]

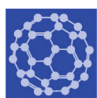

## SUPPLEMENTARY MATERIALS

Evaluation of the NLRP3 Inflammasome Activating Effects of a Large Panel of TiO<sub>2</sub> Nanomaterials in MacrophagesJulia Kolling <sup>1</sup>, Jonas Tigges <sup>1,2</sup>, Bryan Hellack <sup>3,4</sup>, Catrin Albrecht <sup>1,5</sup> and Roel P. F. Schins <sup>1,\*</sup>

<sup>1</sup> IUF—Leibniz Research Institute for Environmental Medicine, Auf'm Hennekamp 50, 40225 DE Düsseldorf, Germany; julia.kolling@gmx.de (J.K.); jonas.tigges@gmx.de (J.T.); catrin.albrecht@sachsen-anhalt.de (C.A.)

<sup>2</sup> Bundeswehr Institute of Pharmacology and Toxicology, Neuherbergstraße 11, 80937 DE Munich, Germany

<sup>3</sup> Institute of Energy and Environmental Technology e.V. (IUTA), Bliersheimer Str. 60, 47229 Duisburg, Germany; bryan.hellack@uba.de

<sup>4</sup> UBA—German Environment Agency, Paul-Ehrlich-Str. 29, 63225 Langen, Germany

<sup>5</sup> State Office for Consumer Protection Saxony-Anhalt, 39576 Stendal, Germany

\* Correspondence: roel.schins@uni-duesseldorf.de; Tel.: +49-211-3389-269

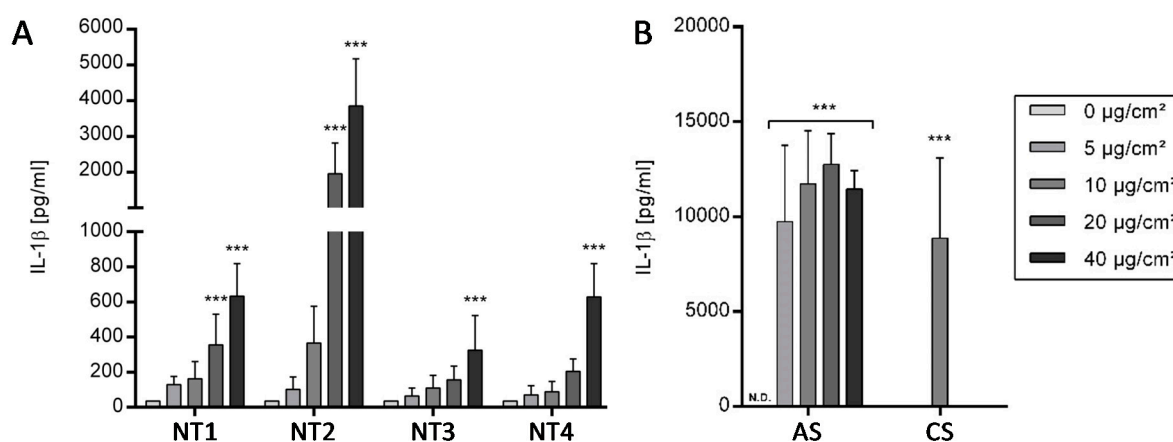

**Figure S1.** Interleukin-1β concentrations in cell culture supernatants of BMDMs after 24 h treatment with different TiO<sub>2</sub> NMs, amorphous silica and crystalline silica. BMDMs were primed for 4 h with 10 ng/ml LPS followed by 24 h treatment with 5–40 μg/cm<sup>2</sup> TiO<sub>2</sub> NMs (NT1, NT2, NT3, NT4) or amorphous SiO<sub>2</sub> (AS). The crystalline silica sample DQ12 (CS) was used as a positive control at a single concentration of 10 μg/cm<sup>2</sup>. IL-1β concentrations in culture supernatants were analysed by ELISA. Mean and standard deviation of 3 independent experiments are depicted. The asterisks indicate a significant change in IL-1β concentration compared to untreated control (\*  $p \leq 0.05$ ; \*\*\*  $p \leq 0.001$ ; N.D. = not detectable).

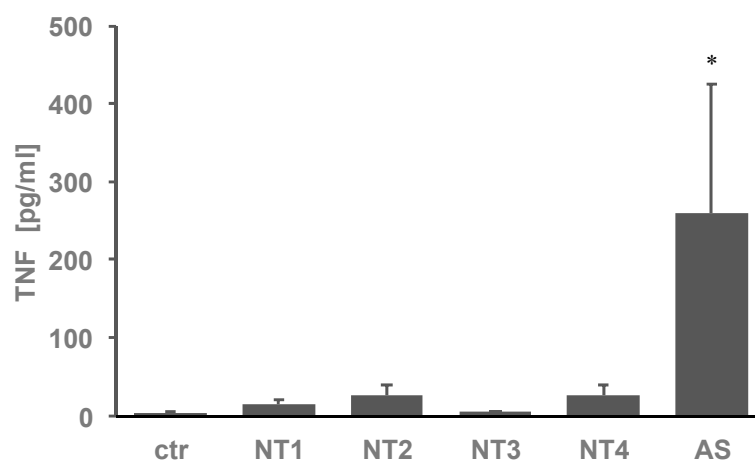

**Figure S2.** Tumor Necrosis Factor concentrations in supernatants of NR8383 cell cultures after 24 h treatment with different TiO<sub>2</sub> NMs and amorphous silica. The cells were treated for 24 h with 40 µg/cm<sup>2</sup> of the four different TiO<sub>2</sub> NMs (NT1-4) or amorphous silica (AS). Levels of TNF in culture supernatants were detected by a commercial rat ELISA kit according to the manufacturer's instructions (R&D/Biotechne, Minneapolis, MN, USA). Mean and standard deviation of three independent experiments are depicted. The asterisks indicate a significant difference compared to the untreated controls. (\*  $p \leq 0.05$ ).
